# 1 **A Preliminary Assessment of Novel Coronavirus (COVID-19) Knowledge and Perceptions** 2 **in Nigeria**

## 3 4 **Abstract**

5 *Background:* This study assessed knowledge and perceptions about COVID-19 among the  
6 general public in Nigeria during the initial week of the pandemic lockdown in the country.

7 *Methods:* From March 28 to April 4, 2020, this cross-sectional survey used an anonymous online  
8 questionnaire to collect data from respondents within Nigeria. Purposive and snowball sampling  
9 techniques were used to recruit 1357 respondents, aged 15-70 years, from 180 cities and towns  
10 within Nigeria. Study data were analysed using descriptive statistics.

11 *Results:* Approximately more than half (57.02%) of the respondents were male with high level of  
12 education (48.86% bachelor's degree or higher). Approximately half of the respondents  
13 (46.94%) opined that COVID-19 was “a biological weapon designed by the Chinese  
14 government.” About 94% of the respondents identified “contact with airborne droplets via  
15 breathing, sneezing, or coughing” as the most common mode of transmission; most respondents  
16 associated COVID-19 with coughing (81.13%), shortness of breath (73.47%) and fever  
17 (62.79%). “Regular hand washing and social distancing” was selected by most respondents  
18 (94.25%) as a way of preventing infection whereas 11.86% reported “consuming gins, garlic,  
19 ginger, herbal mixtures and African foods/soups” as preventive measures against COVID-19.  
20 Majority of the respondents (91.73%) thought COVID-19 is deadly; and most respondents  
21 (84.3%) got 4 or more answers correctly. It was also observed that the traditional media  
22 (TV/Radio) are the most common source of health information about COVID-19 (93.5%).

23 *Conclusions:* Findings revealed that Nigerians have relatively high knowledge, mostly derived  
24 from traditional media, about COVID-19. Their perceptions of COVID-19 bear implications  
25 across public health initiatives, compliance with precautionary behavior as well as bilateral  
26 relations with foreign nations. Evidence-based campaign should be intensified to remove  
27 misconceptions and promote precautionary measures.

28 **Keywords:** COVID-19, Knowledge, Perceptions, Coronavirus, Infection Prevention, Media

29

## 1 **1. Introduction**

2 The novel Coronavirus disease 2019 (COVID-19), first identified in Wuhan China in December  
3 2019, has rapidly spread to almost every region of the world. The disease is caused by a new and  
4 severe type of Coronavirus known as severe acute respiratory syndrome coronavirus 2 (SARS-  
5 CoV-2). The infection has no immediate treatment and vaccine, and it has according to World  
6 Health Organization [1] become a worldwide pandemic causing significant morbidity and  
7 mortality. There are 1,603,428 confirmed cases, 356,440 recoveries from the illness and 95,714  
8 deaths worldwide as of April 9, 2020 [2]. On February 27, 2020, an Italian citizen became the  
9 index case for COVID-19 in Nigeria and as at April 9, 2020, there were 288 laboratory-  
10 confirmed cases of COVID-19 in Nigeria with 51 discharges and 7 deaths [3].

11 To prevent further spread of the virus, civil societies and government agencies embarked on  
12 enlightenment campaigns for good hygiene and social distancing. Temperature screening was  
13 conducted at airports and those returning from countries with numerous confirmed cases of  
14 COVID-19 were implored to self-isolate. The NCDC in association with State governments also  
15 began tracing and tracking of possible victims and their contacts. On March 18, 2020, the Lagos  
16 State government suspended all gatherings above fifty people for four weeks and ordered all  
17 lower and middle level public officers to stay-at-home [4]. Similarly, the Federal government, on  
18 March 30, 2020 introduced various containment strategies such as closing of the national borders  
19 and airspace, schools, worship centers and other public places, canceling of mass gathering  
20 events and placing the Federal Capital Territory, Lagos and Ogun states on lock down for an  
21 initial period of fourteen days [5]. Covid-19 testing laboratories were set up in Lagos, Abuja and  
22 Irrua in Edo State while State governments opened isolation centres and imposed dawn to dusk  
23 curfews in their territories.

24 COVID-19, from the family of Coronavirus (others include SARS, H5N1, H1N1 and MERS), is  
25 a contagious respiratory illness transmitted through the eyes, nose, and mouth, via droplets from  
26 coughs and sneezes, close contact with infected person and contaminated surfaces. It has an  
27 incubation period of approximately one to fourteen days. The symptoms include cough, fever  
28 and shortness of breath, and it is diagnosed through a laboratory test. The contagion could lead to  
29 severe respiratory problems or death, particularly among the elderly and persons with underlying  
30 chronic illnesses. Some infected persons however, are carriers for the virus with no symptoms  
31 while others may experience only a mild illness and recover easily [6]. As there is currently no  
32 cure or vaccine for the COVID-19; medical treatments are limited to supportive measures aimed  
33 at relieving symptoms, use of research drugs and therapeutics.

34 Knowledge of infection pathways and relevant precautions to take is needed to control the  
35 pandemic. While the scientific community continues to research possible vaccines or drugs for  
36 the viral infection, it is expected that adequate knowledge will motivate individuals to make  
37 decisions which may prevent and curb the epidemics. Knowledge such as regular hand washing,  
38 using hand sanitizers, wearing face masks, respiratory etiquettes, social distancing and self-

1 isolation when sick are vital to reducing widespread infection [7]. Studies [8,9,10] revealed that  
2 individuals' level of knowledge about an infectious disease can make them behave in ways that  
3 may prevent infection. Consequently, individuals may need to be informed about the potential  
4 risks of infections in order to adopt the right precautionary measures [11].

5 At early stages of a pandemic, precautionary measures are needed to protect against possible  
6 danger and curtail the disease spread. In line with this therefore, the Nigerian government (just  
7 like other governments around the world) introduced various containment strategies which have  
8 interfered with individuals' daily lives and have led to severe economic loss and social  
9 disruption. People were coerced to stay at home, businesses and offices were closed, exempting  
10 healthcare facilities/workers and "essential" commercial establishments. For Nigerians making a  
11 living in the informal economy, their livelihood is now threatened by the lockdown since much  
12 of their activities and businesses involve face-to-face contact. In Nigeria there is no social safety  
13 net, no access to food stamps or unemployment benefits, most people earn their living on a daily  
14 basis. Regardless of this however, there has so far been a high degree of compliance with the  
15 government directives, Nigerians are engaging in vigilant hand washing, practicing social  
16 distancing and self-isolation, and avoiding going to work, school or crowded areas. Even most  
17 religious leaders agreed to stop large gatherings, forbid the shaking of hands and directed church  
18 members to pray at home and use hand sanitizers [12,13].

19 On the other hand, some Nigerians due to superstitions and ignorance of the science behind the  
20 infection prefer only to pray (even violating the social distancing rule by attending churches or  
21 mosques during the lockdown) and use anointing oils, talisman, herbs or rituals [14] to prevent  
22 contracting and spreading the virus. Some also use social media platforms (e.g. Whatsapp,  
23 Twitter, Facebook and Instagram) to spread fear, project fake news concerning the source of the  
24 virus, promote prejudice against China, incite panic buying, proffer fake cures and undermine  
25 medical advice, deliberately or ignorantly [15]. They opined that lockdown, self-isolation and  
26 social distancing are un-African solutions to the pandemic [14].

27 Given the importance of knowledge of precautionary activities in curbing the spread of  
28 infectious diseases such as the novel COVID-19, it is important to research on people's health  
29 knowledge at this period of the pandemic. Richards [16] reported that knowledge among  
30 ordinary people about how to eliminate risks of contracting Ebola virus led to a rapid drop in  
31 mid-2015 in the number of cases of infection. Therefore, in this study, we hope to ascertain the  
32 level of the knowledge of COVID-19 among a sample of Nigerians as well as their perceptions  
33 of the pandemic. The present study is guided by the following questions:

- 34 • What is the knowledge of Nigerians about the source of COVID-19?
- 35 • What is the knowledge of Nigerians about the mode of transmission of COVID-19?
- 36 • What is the knowledge of Nigerians about the symptoms of COVID-19?
- 37 • What is the knowledge of Nigerians on preventive behavior toward COVID-19?
- 38 • How fatal do Nigerians perceive COVID-19?

- 1 • What are the major sources of information about COVID-19 among Nigerians?

## 2 **2. Methods**

### 3 2.1. Setting and Participants

4 This cross-sectional survey used an anonymous online questionnaire to collect data from  
5 respondents. Potential respondents were purposively sent the link via Social media (Whatsapp  
6 and Facebook posts) and asked to participate in an online survey. A snowball sampling technique  
7 was employed to recruit more Nigerians living in the country's six geopolitical zones during the  
8 COVID-19 pandemic by encouraging those sent the link to kindly share with their contacts. The  
9 online survey ran during the first week of the lockdown in Nigeria (March 28 to April 4, 2020)  
10 and involved 1,357 respondents from 180 cities and towns in the country.

### 11 2.2. Procedure

12 Due to the Nigerian Government social distance rules and curfew/lockdown enforcement,  
13 physical interaction was not possible, so online promotion of the survey was done and existing  
14 study participants were urged to send the web link of the survey to potential respondents. They  
15 completed the questionnaires hosted on Google online survey platform. Ethical approval was  
16 obtained from the Faculty of Social Sciences Ethical Board, University of Ibadan. Participation  
17 was completely consensual, anonymous and voluntary, and informed consent was obtained from  
18 all respondents.

### 19 2.3. Instruments

20 Socio-demographic data were elicited from the respondents on variables such as gender, age,  
21 marital status, ethnicity, educational qualification, religion, perceived financial situation and  
22 present location.

23 Knowledge about COVID-19 was assessed using five items adapted from the Ebola knowledge  
24 scale developed by [17]. Components of COVID-19 knowledge included the source of COVID-  
25 19, modes of transmission, symptoms, methods of preventing and curbing the infection,  
26 perception of COVID-19 fatality and sources of information about COVID-19. Respondents'  
27 knowledge about COVID-19 is arrived at by summing correct responses across item 1, source of  
28 COVID-19, (correct = [d]), item 2, transmission of COVID-19, (correct = [a], and [b], [c] or [d]),  
29 item 3, prevention of COVID-19, (correct = [b] and [d], [f] or [h]), item 4, symptoms of COVID-  
30 19, (correct = [a], [b] and [g]), and item 5, awareness of COVID-19 fatality, (correct = [a]),  
31 generating a maximum possible score of five. The norm is set at 3 which indicated moderate  
32 level of knowledge about COVID-19. Scores above 3 indicated high level of knowledge about  
33 COVID-19 while scores less than 3 indicated low level of knowledge about COVID-19. The  
34 mean score and standard deviation for the sample population was calculated to indicate the  
35 sample's level of knowledge. Similarly, scores above the norm indicated high knowledge and  
36 score below the norm indicated low knowledge of COVID-19 for the sample.

## 1 2.4. Statistical Analysis

2 Descriptive statistics was used for respondents' socio-demographic characteristics and  
3 knowledge about COVID-19. Percentages of response were calculated according to the number  
4 of respondents per response. Descriptive statistical analysis was performed using IBM SPSS  
5 Statistic version 20.

## 6 3. Results

### 7 3.1. Survey Respondents

8 We received responses from 1403 respondents, as at 4th April, 2020, which was the data cutoff  
9 collection date for this study. We included 1357 respondents from 180 cities and towns in  
10 Nigeria who had completed the online questionnaires (completion rate: 95.72%). The  
11 respondents were aged between 15-70 years (Mean 26.85, SD = 9.17). There were 570 female  
12 respondents (42.0%) and almost all respondents (97.5%) had completed at least high school  
13 education. Majority (68.46%) were Yoruba in South west Nigeria, the region with the highest  
14 reported cases of COVID-19 infection [3]. Table 1 provides the sample demographics.

15 *Table 1. Sample characteristics (n = 1,357) Age (Mean 26.85, SD = 9.17)*

| Variables                  | Categories                    | Frequency | Percent |
|----------------------------|-------------------------------|-----------|---------|
| Gender                     | Female                        | 570       | 42.00   |
|                            | Male                          | 787       | 58.00   |
| Educational qualification  | High School                   | 349       | 25.72   |
|                            | Diploma                       | 313       | 23.07   |
|                            | Degree                        | 421       | 31.02   |
|                            | Higher degree                 | 242       | 17.83   |
|                            | Others                        | 32        | 2.36    |
| Perceived Financial Status | Don't meet basic needs        | 246       | 18.13   |
|                            | Just meet basic needs         | 479       | 35.30   |
|                            | Meet needs with a little left | 387       | 28.52   |
|                            | Live comfortably              | 245       | 18.05   |
| Relationship Status        | Single/Not dating             | 560       | 41.27   |
|                            | Single/but dating             | 524       | 38.61   |
|                            | Married                       | 269       | 19.82   |
|                            | Separated/divorced/widowed    | 4         | 0.29    |
| Ethnic Grouping            | Hausa-Fulani                  | 138       | 10.17   |
|                            | Igbo                          | 115       | 8.47    |
|                            | Yoruba                        | 929       | 68.46   |
|                            | Other ethnicities             | 175       | 12.90   |
| Religion                   | Christianity                  | 842       | 62.05   |
|                            | Islam                         | 506       | 37.29   |
|                            | Others                        | 9         | 0.66    |

1 3.2. Knowledge of COVID-19

2 **What is the knowledge of Nigerians about the source of COVID-19?**

3 Approximately half of the respondents (46.94%) opined that COVID-19 is “a biological weapon  
4 designed by the government of China” while 41.93% identified it as “a severe illness transmitted  
5 to people from wild animals” (fig. 1).

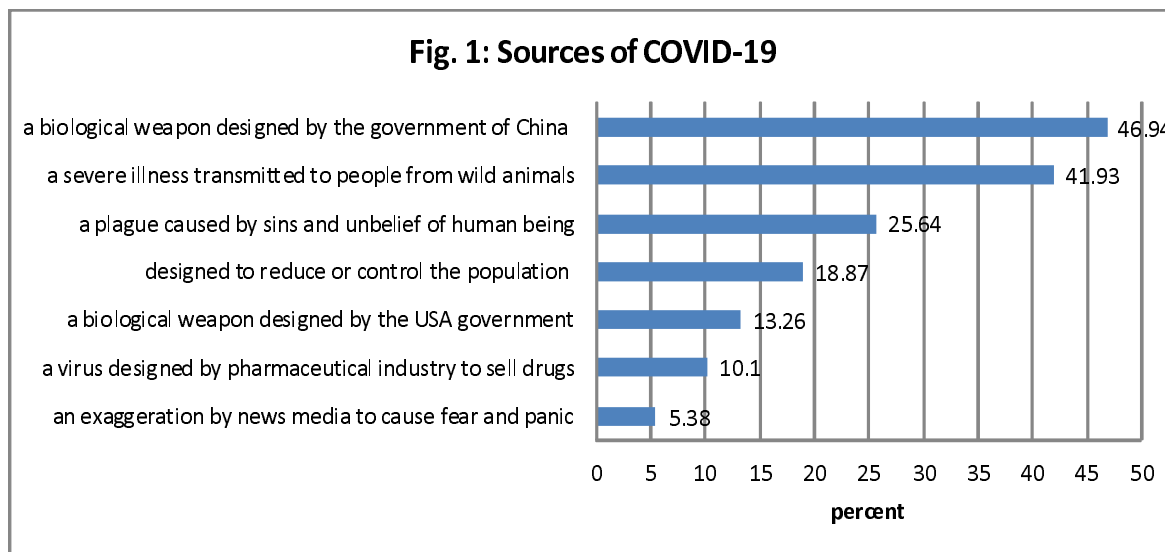

6

7 **What is the knowledge of Nigerians about the mode of transmission of COVID-19?**

8 Regarding knowledge about the most common perceived mode of transmission, almost all  
9 (94.10%) selected “contact with droplets from an infected person/organism via breathing,  
10 sneezing, or coughing” while a little above average (54.97%) picked “touching contaminated  
11 objects or surfaces” as a mean of transmitting and contacting the virus (fig. 2).

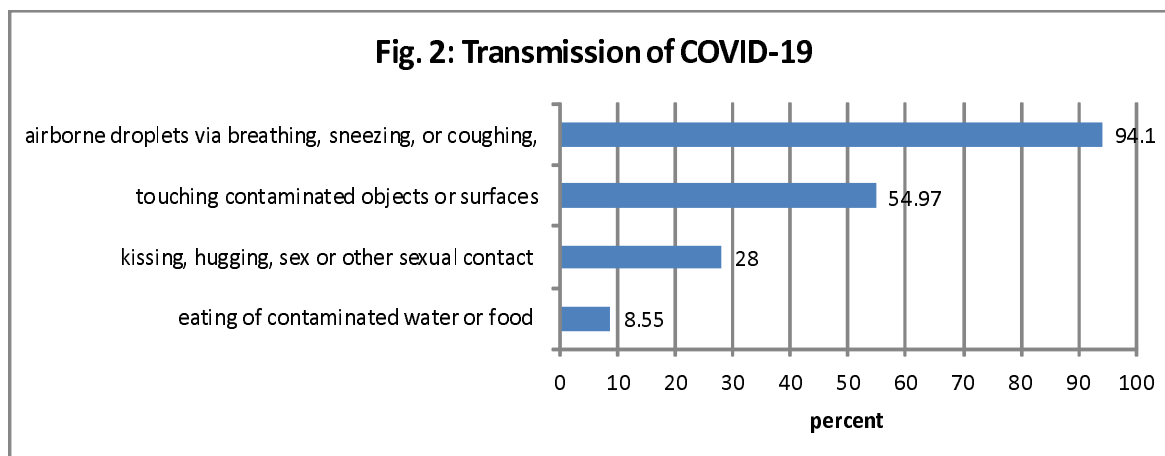

12

1 **What is the knowledge of Nigerians about the symptoms of COVID-19?**

2 Most respondents accurately associated COVID-19 with coughing (81.13%), shortness of breath  
3 (73.47%), sneezing (69.71%), fever (62.79%) and sore throat (56.82%) while 1.62% claimed to  
4 have no idea about the symptoms of the disease (fig. 3).

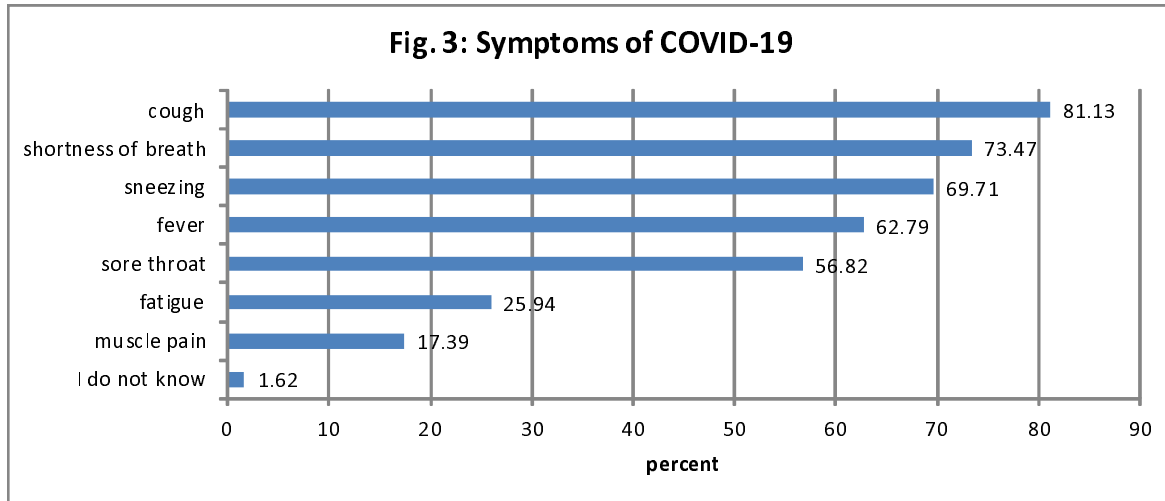

5

6 **What is the knowledge of Nigerians on preventive behavior toward COVID-19?**

7 “Regular hand washing and social distancing” were selected by most respondents (94.25%) as a  
8 way of preventing COVID-19 infection while about half (48.86%) supported “disinfecting  
9 contaminated surfaces” and 40.01% supported “closing schools and cancelling mass gathering  
10 events” whereas more than a tenth (11.86%) held “consuming gins, garlic, ginger, herbal  
11 mixtures and African foods/soups” as preventive measures against COVID-19 (fig. 4).

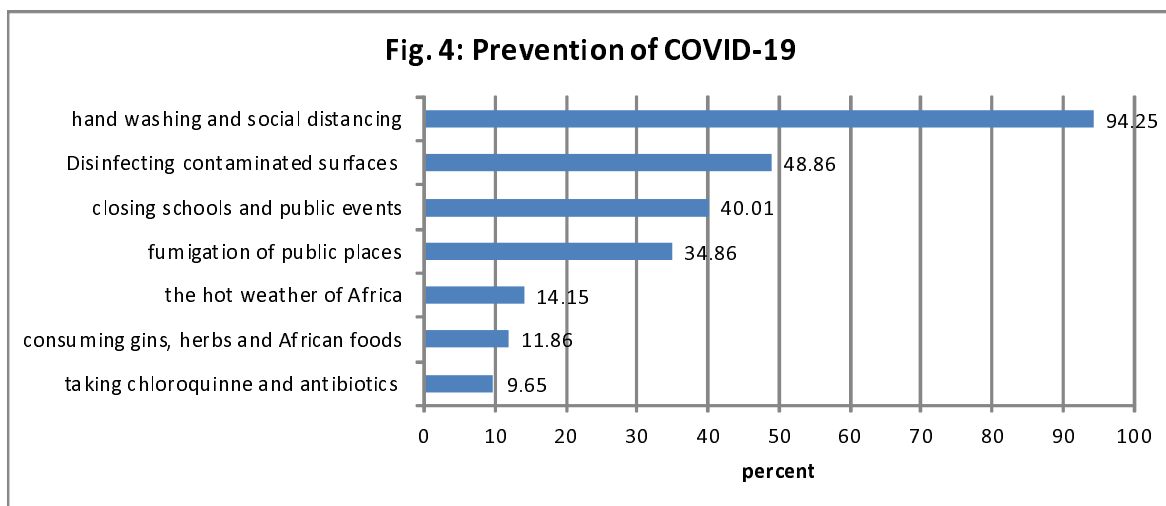

12

13 **How fatal do Nigerians perceive COVID-19?**

14 Fig. 5 revealed that majority of the respondents (91.73%) acknowledged that “it is possible to die  
15 from COVID-19.”

1

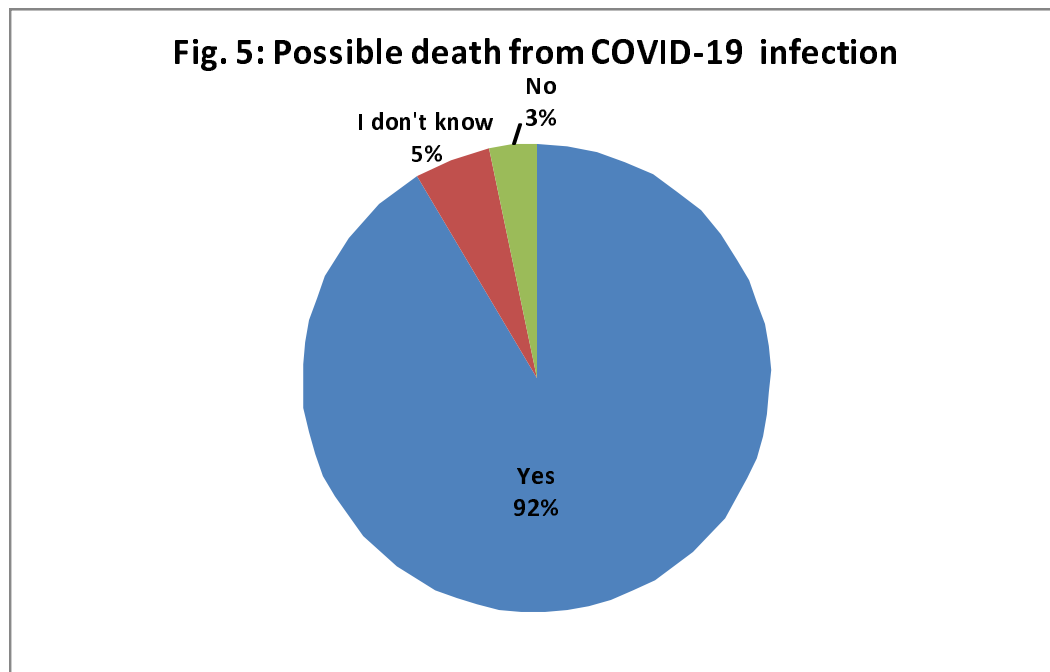

2

3

#### 4 What are the major sources of information about COVID-19 among Nigerians?

5 The most common sources of information about COVID-19 were the mass media (radio,  
6 television and newspapers) (81.5%) followed by social media (e.g. Whatsapp, Facebook,  
7 Twitter, Instagram, etc.) and the Internet (61.53%) (fig. 6).

8

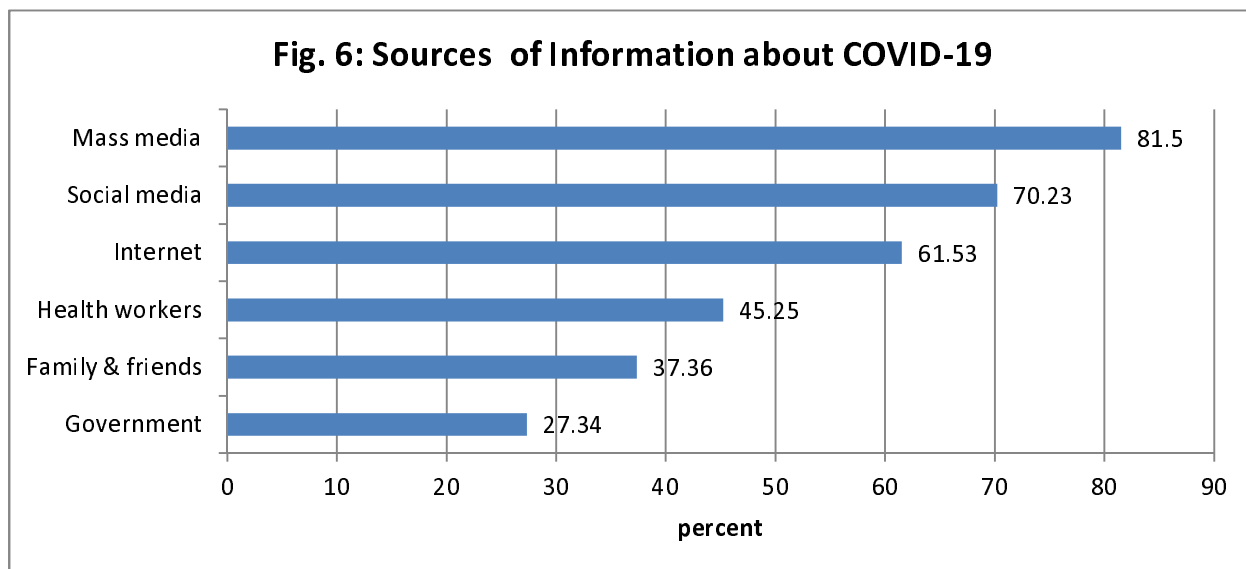

9



1 Table 2 below showed that most respondents (83.86%) had high knowledge about COVID-19  
2 (got more than 3 answers correctly) and 13.34% reported average knowledge (3 correct answers)  
3 while 2.79% had low knowledge (less than 3 correct answers) about COVID-19. Respondents in  
4 this sample had a mean total knowledge score of 4.17 (SD = 0.77) which is above the norm score  
5 of 3.

6 ***Table 2: Total knowledge score***

| Correct answers | Frequency | Percent | Mean (SD)   |
|-----------------|-----------|---------|-------------|
| None            | 1         | 0.07    |             |
| One             | 4         | 0.29    |             |
| Two             | 33        | 2.43    |             |
| Three           | 181       | 13.34   | 4.15 (0.77) |
| Four            | 667       | 49.15   |             |
| Five            | 471       | 34.71   |             |

7

#### 8 **4. Discussion**

9 Since its discovery in 2019, the COVID-19 seems to have become one of the largest pandemics  
10 in the world involving more than 200 countries [2]. This study set out to assess the knowledge of  
11 the general public in Nigeria about COVID-19 during the initial week of the pandemic lockdown  
12 in the country. For individuals to survive in the era of pandemic, adequate knowledge of the  
13 disease that caused the pandemic is required. Such knowledge can help to contain the pandemic  
14 by adopting right precautionary measures, which will invariably boost both the physical and  
15 mental health of the individuals.

16 Findings from this study indicated that a large proportion of the study participants are aware and  
17 knowledgeable about the COVID-19 and its presence in Nigeria. Results obtained from the  
18 research questions regarding knowledge of COVID-19 in terms of respondents' knowledge of  
19 the source of COVID-19, transmission of COVID-19, symptoms of COVID-19, preventive  
20 behavior toward COVID-19, fatality rate of the COVID-19 and what the major sources of  
21 information about COVID-19 among Nigerians are, were significantly high.

22 Specifically, this study found that a large percentage of Nigerians hold the view that the COVID-  
23 19 is a biological weapon designed by the government of China. This is evident of the diverse  
24 sources of information concerning the COVID-19 that is available to Nigerians [15]. What this  
25 means is that there may currently be no consensus among Nigerians as to what the real source of  
26 the virus is. We caution that this perception has implications for bilateral relations between the

1 Nigerian and the Chinese governments and may stand as a hindrance to Nigerians accepting  
2 whatever form of aid may come from the Chinese government. It is important the government of  
3 Nigeria and other stake holders embark on campaigns to raise awareness of the true sources of  
4 the COVID-19 in order to curb a brewing stereotype and prejudice towards the Chinese.

5 Concerning the source of the COVID-19 also, our findings highlight implications for religious  
6 leaders. A reasonable percentage of Nigerians also opined that the COVID-19 is a plague caused  
7 by sins and unbelief of human beings. While this may be consistent with many religious beliefs,  
8 we believe that it may foster carefree attitudes in Nigerians, making them relax and resort to only  
9 prayers and spiritual healings without adhering to the prescribed hygiene practices [14]. We  
10 therefore urge clerics at all levels to also educate members of their faiths about the COVID-19.

11 As expected, because Nigerians had relatively high knowledge of the COVID-19, even though  
12 laden with several misconceptions, their knowledge of precautionary behavior was also high. For  
13 instance, a good percentage agreed that a range of WHO approved and global practices such as  
14 hand washing and social distancing, disinfecting contaminated surfaces, closing schools and  
15 public events and fumigation of public places were key to preventing the spread of the virus.  
16 Only a little percentage agreed relying on the hot weather in Africa, consumption of gins, herbs  
17 and African foods as well as chloroquine and antibiotics as precautions to the spread of the  
18 pandemic.

19 These findings are in consonance with previous studies such as [8,9,10]. These authors reported  
20 that one's level of knowledge about an infectious disease can make one to behave in ways that  
21 can prevent infection. Also, the study supported Richards [16] who opined that knowledge  
22 among ordinary people about how to eliminate risks of contracting Ebola virus led to a rapid  
23 drop in mid-2015 in the number of cases of infection. Consequently, individuals need to be  
24 informed about the potential risk of infection (COVID-19) in order to adopt the right  
25 precautionary measures. One suggestion for this result is the knowledge factor. That is, Nigerians  
26 have knowledge of COVID-19 and therefore are better able to adopt precautionary measures.

27 Majority of the respondents (more than 90%) agreed that COVID-19 has high fatality and this is  
28 confirmed by the reported 79,384 deaths worldwide as of April 7, 2020 [2].

29 The findings also identified the mass media as the major sources of information about COVID-  
30 19 which is similar to a study conducted during the SARS epidemic in Hong Kong [18].  
31 Likewise Vartti et al. [19] and Voeten et al. [20] confirmed that the traditional media provide  
32 vital information during outbreaks. However, it contradicted Rolison and Hanoch [17] which  
33 revealed that the internet is the premier source of knowledge during an outbreak. The media  
34 should be intensively used by governmental and non-governmental agencies to provide regular  
35 enlightenment on proper social distancing, correct personal hygiene and usage of personal  
36 protective equipment to ensure compliance with the WHO approved strategies for curbing the  
37 pandemic.

## 1 Limitations

2 The time-sensitivity of the novel Coronavirus disease 2019 pandemic led to the adoption of the  
3 snowball sampling strategy which might limit generalizability of the finding to the general  
4 population. There was an oversampling of respondents from the Yoruba ethnic group, leading to  
5 selection bias. Similarly the findings may not be generalizable to the less educated people.  
6 Notwithstanding the above limitations, this study provides a baseline of information on  
7 knowledge and perceptions about the ravaging COVID-19 from respondents across 180  
8 municipalities in Nigeria. It is worthy of note that this study is an exploratory one and is part of a  
9 larger study aimed at understanding and outlining how knowledge and awareness of COVID-19  
10 among Nigerians is shaping their response to the pandemic and precautionary behavior. There is  
11 need for further research to build the evidence base for the study of COVID-19 knowledge and  
12 precautionary measures.

## 13 5. Conclusions

14 Due to the concern of everyone about COVID-19, the present study, in possibly, is the first  
15 survey to assess the knowledge and perceptions about COVID-19 among Nigerians. This study  
16 was significant because it studied knowledge about COVID-19 in Nigeria across different and  
17 many cities in the country. The knowledge areas include source, transmission, symptoms,  
18 sources of information and preventive behavior toward COVID-19. The findings tentatively  
19 affirm that Nigerians are highly knowledgeable about COVID-19 and their premier sources of  
20 information about the pandemic are the traditional media. It is therefore recommended that all  
21 stake holders should intensify their effort in sensitizing the general public to understand and  
22 comply with all precautionary measures to curb COVID-19.

## 23 References

- 24 [1] World Health Organization, (WHO), *WHO Director-General's opening remarks at the media*  
25 *briefing on COVID-19—11 March 2020*. Geneva, Switzerland: World Health  
26 Organization; 2020. [https://www.who.int/dg/speeches/detail/who-director-general-s-](https://www.who.int/dg/speeches/detail/who-director-general-s-opening-remarks-at-the-media-briefing-on-covid-19—11-march-2020)  
27 [opening-remarks-at-the-media-briefing-on-covid-19—11-march-2020](https://www.who.int/dg/speeches/detail/who-director-general-s-opening-remarks-at-the-media-briefing-on-covid-19—11-march-2020), 2020. (accessed  
28 24 March 2020).
- 29 [2] Worldometers, *Coronavirus Update (Live)*. <https://www.worldometers.info/coronavirus/>,  
30 2020. (accessed 9 April 2020).
- 31 [3] Nigeria Centre for Disease Control (NCDC) (April 9, 2020). *COVID-19 case update*.  
32 <https://twitter.com/NCDCgov/> (accessed 9 April 2020).
- 33 [4] R. Ewodage, *COVID-19: How We Plan To Implement Social Distancing In Lagos Markets,*  
34 *Transport System – Sanwo-Olu*. [https://www.channelstv.com/2020/03/22/covid-19-how-](https://www.channelstv.com/2020/03/22/covid-19-how-we-plan-to-implement-social-distancing-in-lagos-markets-transport-system-sanwo-olu/)  
35 [we-plan-to-implement-social-distancing-in-lagos-markets-transport-system-sanwo-olu/](https://www.channelstv.com/2020/03/22/covid-19-how-we-plan-to-implement-social-distancing-in-lagos-markets-transport-system-sanwo-olu/),  
36 2020. (accessed 29 March 2020).

- 1 [5] Radio Nigeria, *President Buhari urges caution, not fear over Covid\_19 (Full text)*.  
2 [https://www.radionigeria.gov.ng/2020/03/19/president-buhari-urges-caution-not-fear-](https://www.radionigeria.gov.ng/2020/03/19/president-buhari-urges-caution-not-fear-over-covid_19-full-text/)  
3 [over-covid\\_19-full-text/](https://www.radionigeria.gov.ng/2020/03/19/president-buhari-urges-caution-not-fear-over-covid_19-full-text/), 2020. (accessed 29 March 2020).
- 4 [6] L.M. Sauer, *What Is Coronavirus?* [https://www.hopkinsmedicine.org/health/conditions-and-](https://www.hopkinsmedicine.org/health/conditions-and-diseases/coronavirus)  
5 [diseases/coronavirus](https://www.hopkinsmedicine.org/health/conditions-and-diseases/coronavirus), 2020 (accessed 25 March 2020).
- 6 [7] A. Leppin, A.R. Aro, Risk perception related to SARS and avian influenza: theoretical  
7 foundations of current behavioral research. *International Journal of Behavioral*  
8 *Medicine*. 16 (2009) (1) 7–29. <https://doi.org/10.1007/s12529-008-9002-8>.
- 9 [8] J. Brug, A.R. Aro, A. Oenema, O. de Zwart, J.H. Richardus, G.D. Bishop, SARS risk  
10 perception, knowledge, precautions, and information sources, the Netherlands. *Emerg.*  
11 *Infect. Dis.* 10 (2004) 1486–1489.
- 12 [9] J.S. Choi, N.Y. Yang, Perceived knowledge, attitude, and compliance with preventive  
13 behavior on influenza A (H1N1) by university students. *J. Korean Acad. Adult Nurs.* 22  
14 (2010) (3) 250–259.
- 15 [10] Z.A. Hussain, S.A. Hussain, F.A. Hussain, Medical students' knowledge, perceptions, and  
16 behavioral intentions towards the H1N1 influenza, swine flu, in Pakistan: a brief report.  
17 *Am. J. Infect. Control.* 40 (2012) (3) e11–e13. <https://doi.org/10.1016/j.ajic.2011.12.004>.
- 18 [11] J. Brug, A.R. Aro, J.H. Richardus, Risk perceptions and behaviour: Towards pandemic  
19 control of emerging infectious diseases: International research on risk perception in the  
20 control of emerging infectious diseases. *International Journal of Behavioural Medicine*,  
21 16 (2009) (1) 3-6. <https://doi.org/10.1007/s12529-008-9000-x>.
- 22 [12] F. Makinde, S. Nwogu, T. Ajaja, J. Alagbe, *COVID-19: Adeboye, Oyedepo, Okonkwo,*  
23 *Adeyemi, others hold online services.* [https://punchng.com/covid-19-adeboye-oyedepo-](https://punchng.com/covid-19-adeboye-oyedepo-okonkwo-adeyemi-others-hold-online-services/)  
24 [okonkwo-adeyemi-others-hold-online-services/](https://punchng.com/covid-19-adeboye-oyedepo-okonkwo-adeyemi-others-hold-online-services/), 2020 (accessed 24 March 2020).
- 25 [13] H. Olatunji, *Coronavirus: Catholic Church in Lagos suspends sprinkling of 'holy water',*  
26 *handshakes during mass.* [https://www.thecable.ng/coronavirus-catholic-church-in-lagos-](https://www.thecable.ng/coronavirus-catholic-church-in-lagos-suspends-sprinkling-of-holy-water-handshakes-during-mass)  
27 [suspends-sprinkling-of-holy-water-handshakes-during-mass](https://www.thecable.ng/coronavirus-catholic-church-in-lagos-suspends-sprinkling-of-holy-water-handshakes-during-mass), 2020 (accessed 24 March  
28 2020).
- 29 [14] R. Abati, *Corona Blues.* <http://saharareporters.com/2020/04/07/corona-blues-reuben-abati>,  
30 2020 (accessed 7 April 2020).
- 31 [15] I. Hassan, *The other COVID-19 pandemic: Fake news.*  
32 <https://africanarguments.org/2020/03/26/the-other-covid-19-pandemic-fake-news/>, 2020  
33 (accessed 29 March 2020).

- 1 [16] P. Richards, *Ebola: How a people's science helped end an epidemic*, London, Zed Books,  
2 2017.
- 3 [17] J.J. Rolison, Y. Hanoch, Knowledge and risk perceptions of the Ebola virus in the United  
4 States. *Preventive Medicine Reports*. 2 (2015) 262–264.  
5 <https://doi.org/10.1016/j.pmedr.2015.04.005>.
- 6 [18] J.T.F. Lau, X. Yang, H. Tsui, J.H. Kim, Monitoring community responses to the SARS  
7 epidemic in Hong Kong: from day 10 to day 62. *J Epidemiol Commun Health*, 57 (2003)  
8 864–70.
- 9 [19] A.M. Vartti, A. Oenema, M. Schreck, A. Uutela, O. de Zwart, J. Brug, A.R. Aro, SARS  
10 knowledge, perceptions, and behaviors: A comparison between Finns and the Dutch  
11 during the SARS outbreak in 2003. *International Journal of Behavioral Medicine*, 16  
12 (2009) (1) 41–48.
- 13 [20] H. Voeten, O. de Zwart, I.K. Veldhuijzen, C. Yuen, X. Jiang, G. Elam, T. Abraham, J.  
14 Brug, Sources of Information and Health Beliefs Related to SARS and Avian Influenza  
15 among Chinese Communities in the United Kingdom and The Netherlands, Compared to  
16 the General Population in these Countries, *International Journal of Behavioral Medicine*.  
17 16 (2009) (1) 49–57. <https://doi.org/10.1007/s12529-008-9006-4>
- 18
